# Supplementary material
Source: Research Square preprint supplement (doi:10.21203/rs.3.rs-9878253/v1)
Supplement: Supplementary file 1 [file 9cfd533b5541ae332ca4d373.xlsx]

## Sheet: Table S1
Extended DataTable 1 | Specific cultivation parameters for wheat grown in the speed breeding in plant factory environment
Parameter	Intensity
Temperature (light/dark)	21±1.8℃/17±1.8℃
Relative humidity (%)	55±5.3
CO₂ concentration (μmol·mol⁻¹)	400±30
Nutrient solution EC value (mS·cm⁻¹)	1.2-1.8
Light system	Light-emitting diodes (LEDs); photosynthetic photon flux density 400±20 (μmol·m⁻²·s⁻¹)
Photoperiod (light/dark)	22 h light / 2 h dark
Vernalization	None

## Sheet: S2
Extended Data Table 2 | The time required for Zhongkemai 181, Zhongkenuomai 2168, and Zhongkezinuomai 168 to grow to tillering stage (Z21), booting stage (Z31), heading stage (Z55), flowering stage (Z65), and ripeness stage (Z91) under normal field sowing (Field), delayed sowing by 15 days (DS15), delayed sowing by 30 days (DS30), delayed sowing by 45 days (DS45), and plant factory-based speed br…
Cultivar	Environment	Tillering stage (Z21)	Booting stage (Z31)	Heading stage (Z55)	Flowering stage(Z65)	Ripeness (Z91)
Zhongkemai 181	Field	43	84	144	158	191
	DS15	38	75	130	141	173
	DS30	35	67	112	125	153
	DS45	33	58	96	109	136
	PF	23	37	51	58	81
Zhongkenuomai 258	Field	35	77	138	151	183
	DS15	33	69	124	136	167
	DS30	30	61	108	120	149
	DS45	28	54	93	104	131
	PF	18	31	44	51	73
Zhongkenuomai 2168	Field	37	78	140	154	185
	DS15	34	71	125	138	168
	DS30	32	64	110	121	151
	DS45	31	56	94	106	132
	PF	21	35	47	54	75
Zhongkezinuomai 168	Field	42	83	145	157	189
	DS15	37	74	129	142	172
	DS30	34	66	111	124	153
	DS45	31	56	96	107	135
	PF	20	32	46	55	76

## Sheet: S3
Extended Data Table 3 | Statistics of important agronomic traits for four wheat varieties under field normal sowing (Field), delayed sowing by 15 days (DS15), delayed sowing by 30 days (DS30), delayed sowing by 45 days (DS45), and plant factory speed breeding (PF) environments
Cultivar	Environment	Sample number	TGW	GL/GW	GL	GW	GR	PTN	PHT	SL	FSN	SSN	TSN	GNS	GNFS	SC	TYPP
ZKM181	Field	16	39.30±5.06aA	2.12±0.11cB	6.51±0.21bB	3.11±0.16aA	0.48±0.02bB	9.12±3.40bB	64.06±3.56aA	10.03±0.51aA	21.43±1.15aA	0.62±0.50bB	22.06±0.92bB	60.87±10.20aA	2.83±0.44aA	2.20±0.10cC	22.38±10.56aA
	DS15	17	35.08±5.32bB	2.15±0.06bB	6.39±0.54dD	3.00±0.27bB	0.47±0.01bB	6.05±1.67cC	58.61±3.79bB	8.97±0.54bB	20.47±1.50bB	0.70±0.77bB	21.17±1.59cC	54.82±14.51bB	2.68±0.68bB	2.36±0.14cC	12.25±5.74bB
	DS30	16	33.49±5.22cC	2.23±0.10aA	6.63±0.23aA	3.01±0.16bB	0.46±0.02cB	5.06±1.23dD	54.16±2.24cC	8.06±0.48cB	21.00±1.31aA	0.00±0.00dD	21.00±1.31cC	52.25±8.63cC	2.48±0.37cC	2.60±0.10cB	9.02±3.69cC
	DS45	18	32.61±3.13cD	2.20±0.07aA	6.44±0.27cC	2.97±0.12cC	0.47±0.02bB	4.27±1.36eE	53.26±2.41cD	7.31±0.53cC	19.72±1.52cC	0.16±0.38cC	19.88±1.56dD	48.61±9.15dD	2.46±0.38cC	2.72±0.14bB	7.17±3.53cC
	PF	11	29.01±4.92dD	2.00±0.14cC	5.79±0.21eE	2.95±0.15cC	0.51±0.04aA	14.00±3.60aA	43.14±2.99dD	6.90±0.62dD	19.54±5.12dD	5.90±5.28aA	25.45±1.96aA	36.00±13.43eE	1.80±0.35dD	3.70±0.29aA	13.10±4.57bB
ZKNM258	Field	17	44.45±6.12aA	2.14±0.13bB	6.83±0.20aA	3.25±0.20aA	0.48±0.02bB	7.12±2.09bB	73.59±3.11aA	9.72±0.80aA	21.35±0.70aA	0.24±0.44cC	21.59±0.80aA	72.18±11.93aA	3.38±0.53aA	2.23±0.17dC	23.36±10.50aA
	DS15	16	38.54±7.80bB	2.24±0.18bA	6.66±0.36bB	3.03±0.33bB	0.46±0.03cB	4.44±1.46dD	68.09±3.67bB	8.38±0.73bB	19.38±0.81bB	0.56±0.51bB	19.94±0.85bB	58.38±8.73bB	3.01±0.46bB	2.39±0.19cC	10.60±5.91cC
	DS30	17	37.61±4.05cB	2.24±0.08bA	6.80±0.17aA	3.08±0.13bB	0.46±0.01cB	5.29±1.69cC	64.87±3.95cC	7.38±0.49cC	19.35±1.17bB	0.12±0.33dD	19.47±1.18cB	52.88±10.52cC	2.73±0.52cC	2.64±0.12bB	10.61±4.12cC
	DS45	16	32.74±7.72cC	2.32±0.15aA	6.56±0.41cB	2.89±0.26cC	0.44±0.03cC	3.50±0.97eE	59.88±3.72dD	6.46±0.54dD	16.81±2.64cC	0.25±0.68cC	17.06±2.54cC	44.94±8.11dD	2.67±0.26dC	2.64±0.27bB	5.51±2.92dD
	PF	11	43.72±2.89aA	1.97±0.06cC	6.50±0.20cC	3.33±0.08aA	0.52±0.02aA	17.08±6.65aA	46.75±4.56eE	5.62±0.40eE	11.17±3.24dD	8.92±3.45aA	20.08±1.68bB	19.75±4.92eE	1.85±0.50dD	3.58±0.26aA	14.13±7.99bB
ZKNM2168	Field	16	51.89±9.58aA	2.20±0.14dC	7.25±0.29bA	3.34±0.28bA	0.46±0.03bB	6.94±1.57bB	77.93±4.05aA	13.13±0.79aA	19.31±1.08aA	0.31±0.48bB	19.63±0.96aA	51.50±9.21bA	2.67±0.47cC	1.49±0.09cC	18.56±6.17aA
	DS15	17	51.16±6.53bA	2.23±0.14cC	7.46±0.20aA	3.39±0.22aA	0.46±0.02bB	4.53±1.23cC	76.91±2.94aA	12.41±0.93bB	18.29±0.92bB	0.35±0.49bB	18.65±0.99bB	53.88±6.18aA	2.95±0.36aA	1.51±0.11cC	12.75±4.45bB
	DS30	13	46.20±6.54bB	2.27±0.12bB	7.24±0.19bA	3.25±0.20bB	0.45±0.02cB	3.85±1.82dD	69.15±4.57bB	10.88±0.75cC	18.08±2.02bB	0.15±0.38cC	18.23±1.96cB	49.46±8.10bB	2.73±0.27bB	1.67±0.11bB	9.20±5.11cB
	DS45	13	37.91±10.50cC	2.39±0.11aA	7.07±0.52bB	2.99±0.31cC	0.43±0.02cC	3.69±1.18eD	68.03±4.16bB	9.95±1.08dD	16.15±1.91cC	0.00±0.00	16.15±1.91cC	45.46±9.63cC	2.79±0.43bB	1.63±0.11bB	6.64±3.53cB
	PF	11	52.11±4.07aA	1.99±0.06dD	6.82±0.23cC	3.45±0.07aA	0.51±0.02aA	8.92±3.99aA	49.72±5.79cC	8.06±0.94eE	16.33±3.50cC	3.50±3.00aA	19.83±1.27aA	25.08±6.32dD	1.53±0.15dD	2.48±0.19aA	12.60±7.83bB
ZKZNM168	Field	14	42.92±2.96aA	1.89±0.04cC	6.17±0.22aA	3.30±0.13aA	0.54±0.01aA	6.64±2.62bB	70.91±4.76aA	8.95±0.65aA	18.21±1.53aA	0.00±0.00	18.21±1.53bB	73.50±10.54aA	4.02±0.36aA	2.04±0.11eE	21.62±10.81aA
	DS15	12	36.24±5.16bB	1.99±0.12bB	6.18±0.23aA	3.14±0.21bB	0.52±0.03bB	4.33±1.61eD	64.04±3.54bB	8.40±0.91bA	18.17±1.34aA	0.00±0.00	18.17±1.34bB	65.17±15.19bB	3.58±0.75bB	2.17±0.15dD	11.16±5.83bB
	DS30	10	33.66±3.99cC	2.03±0.06aA	6.11±0.19bB	3.06±0.13cC	0.51±0.01cB	4.50±1.58dD	62.15±4.31cC	7.59±0.82bB	18.00±2.26bA	0.00±0.00	18.00±2.26bC	61.90±12.09cC	3.42±0.41cC	2.37±0.15cC	9.78±4.72bB
	DS45	6	31.16±4.55dD	2.05±0.11aA	5.92±0.12cC	2.95±0.16dD	0.50±0.03cC	5.33±1.75cC	60.10±3.28dD	7.03±0.61cC	17.17±3.13bB	0.00±0.00	17.17±3.13cC	58.83±14.72dD	3.38±0.33dC	2.44±0.37bB	10.60±5.55bB
	PF	35	41.81±5.29bA	1.85±0.09dC	5.94±0.37cC	3.25±0.12bA	0.55±0.03aA	14.81±4.53aA	50.19±4.40eE	6.76±0.58dD	8.44±3.52cC	12.08±3.95aA	20.53±2.39aA	17.03±7.49eE	2.06±0.63dD	3.05±0.38aA	10.74±6.4bB
Note: In multiple comparisons, different lowercase letters represent significant differences (P< 0.05), different capital letters represent extremely significant differences (P< 0.01), and letters that do not differ represent no difference (P> 0.05).

## Sheet: S4
Extended Data Table 4 | Statistics of quality-related traits for four wheat varieties under field normal sowing (Field), delayed sowing by 15 days (DS15), delayed sowing by 30 days (DS30), delayed sowing by 45 days (DS45), and plant factory speed breeding (PF) environments
Cultivar	Environment	Sample number	GPC	GSC	WGC	SV	GH	GVW	GWA	DDT	DST	TE	TA	MTR
ZKM181	Field	13	13.68±1.24eE	75.26±1.78aA	28.81±2.89dD	33.07±8.49dD	63.62±4.89bB	762.20±9.26aA	57.21±3.61cC	2.28±0.81dD	6.41±5.72dD	163.02±16.25dD	82.58±59.23aA	750.20±259.36bB
	DS15	10	15.54±0.59dD	73.55±0.92bB	33.19±1.42cC	37.32±3.60cC	61.64±1.91cC	752.91±5.22bB	55.81±2.16cD	2.59±0.49cC	8.05±2.88cC	170.93±10.09cC	31.52±24.77cC	595.18±101.99dD
	DS30	4	16.02±0.36cC	75.17±0.40aA	34.75±0.74bB	43.92±2.98bB	65.77±3.58aA	743.09±11.02cC	62.03±2.30aA	2.80±0.42bA	12.60±2.75bB	191.95±8.00aA	64.15±55.76bB	674.18±179.12cC
	DS45	10	16.67±0.67bB	71.85±1.38cC	35.73±1.40bA	49.57±5.22aA	62.38±3.26bC	742.24±11.59cC	60.45±2.31bA	2.88±0.75aA	17.25±4.47aA	182.69±9.60bB	67.10±59.12bB	808.11±213.89aA
	PF	10	16.81±2.74aA	67.02±1.62dD	36.12±6.52aA	41.94±9.91cB	57.28±3.08cD	756.85±8.09bB	59.63±3.27bB	2.80±1.57bA	11.42±6.80cB	187.28±33.35bA	13.21±25.42dD	55.98±92.35eE
ZKNM258	Field	17	14.21±0.89dD	74.81±1.29bB	29.45±1.96eE	31.54±4.78eE	54.48±1.46cC	758.10±7.58aA	49.46±1.46dD	2.18±0.46dC	6.43±3.30eE	178.09±10.94dD	143.21±26.99cC	858.22±133.84cC
	DS15	10	15.01±0.83dC	75.67±2.05aA	31.36±1.85dD	35.29±5.10dD	53.03±2.62dD	755.28±5.47bB	49.95±3.17dD	2.43±0.40cC	9.24±3.88dD	189.19±4.94cC	157.00±36.51bB	905.53±263.95bB
	DS30	12	15.72±1.47cC	74.00±2.20cC	33.06±3.11cC	40.18±7.45cC	54.02±2.53cC	753.19±5.15cB	52.39±2.78cC	2.67±0.50cB	12.40±4.98cC	189.43±6.24cC	130.02±28.82dD	856.94±152.34cC
	DS45	16	16.23±0.98bB	71.81±1.52dD	33.86±1.89bB	49.22±3.94bB	56.58±3.40bB	759.41±9.98aA	57.97±3.82bB	2.94±0.34bB	19.99±2.94bB	191.01±10.20bB	179.62±47.32aA	1215.03±233.55aA
	PF	11	21.69±1.30aA	64.99±1.64eE	47.28±2.89aA	58.21±7.19aA	58.01±3.13aA	745.13±5.59cC	63.90±3.79aA	4.69±0.50aA	22.00±5.40aA	262.19±14.74aA	81.55±27.32eE	391.92±126.06dD
ZKNM2168	Field	16	15.01±1.17dC	74.15±1.69aA	31.30±2.53dD	35.71±7.65eE	54.73±3.78bB	763.29±8.22aA	51.32±3.78dD	2.64±0.54dD	9.39±5.26eE	179.84±9.79dD	114.60±30.49cC	762.93±136.04cC
	DS15	17	15.65±1.17cC	74.07±2.48aA	32.99±2.49cC	37.07±7.16dD	52.79±4.06cC	761.26±6.52bB	50.54±2.93eE	2.84±0.53cC	10.33±5.21dD	186.35±10.57dC	101.07±33.33dD	722.59±185.49dD
	DS30	13	15.53±0.78cC	73.98±1.30aA	32.93±1.63cC	40.49±6.43cC	56.07±2.45aA	757.71±5.82cC	54.36±3.53cC	2.94±0.34cC	12.97±4.97cC	189.56±5.49cC	126.46±49.30bB	819.13±253.69bB
	DS45	13	16.91±0.96bB	71.06±1.81bB	35.70±2.32bB	50.64±7.00bB	56.71±2.64aA	763.63±18.81aA	56.82±2.76bB	3.66±0.57bB	20.72±5.66bB	197.12±15.38bB	156.03±68.38aA	1047.31±325.15aA
	PF	11	20.97±1.49aA	65.69±3.16Cc	45.32±3.27aA	56.91±9.08aA	51.35±2.96dD	762.93±4.28bA	57.24±3.82aA	4.99±0.42aA	22.54±6.69aA	251.67±15.14aA	73.43±23.32eE	299.50±158.14eE
ZKZNM168	Field	14	16.51±1.23cC	73.79±1.29aA	33.89±2.64dD	43.68±3.26cC	55.81±2.86cC	754.68±8.08bB	49.60±2.45eE	2.52±0.41cC	12.68±1.71dD	200.57±8.59bB	103.10±18.06cC	663.10±106.91dD
	DS15	12	17.25±1.10bB	72.28±1.29bA	35.52±2.19bB	48.08±5.57cB	54.67±4.66dD	752.89±10.47cC	52.64±6.56dD	2.48±0.51cC	16.01±4.27cC	198.69±9.35cB	102.06±64.93cC	801.85±497.95bB
	DS30	9	17.23±0.54bB	72.67±1.01aA	35.81±1.35bB	50.70±4.15bB	55.80±2.02cC	751.58±11.69dC	54.99±4.31cC	2.80±0.36cB	18.29±4.04bB	202.83±8.05bB	114.34±60.52bB	760.18±257.01cC
	DS45	6	16.62±0.58cC	72.48±1.69aA	34.57±1.17cC	49.09±4.26bB	57.49±4.79aA	756.32±9.22aA	56.29±7.30bB	2.97±0.52bB	18.38±3.82bB	191.58±6.96cC	122.78±48.89aA	894.17±355.76aA
	PF	34	21.85±0.94aA	63.01±3.00bB	47.07±2.18aA	60.89±6.38aA	56.65±2.04bB	747.08±7.49dD	61.78±5.39aA	4.73±0.51aA	23.37±5.09aA	257.00±14.07aA	81.71±41.27dD	330.43±164.75eE
Note: In multiple comparisons, different lowercase letters represent significant differences (P< 0.05), different capital letters represent extremely significant differences (P< 0.01), and letters that do not differ represent no difference (P> 0.05).

## Sheet: S5
Extended Data Table 5 | Annual average seed yield and annual average protein yield of Zhongkemai 181, Zhongkenuomai 258, Zhongkenuomai 2168, and Zhongkezinuomai 168 under normal field sowing (Field), delayed sowing by 15 days (DS15), delayed sowing by 30 days (DS30), delayed sowing by 45 days (DS45), and plant factory-based speed breeding (PF) environments
Cultivar	Environment	Annual planting rounds	Yield per m2 (g）	Protein yield per m2 (g)	Ratio of annual average yield compared to field cultivation (fold)	Ratio of annual average protein yield compared to field cultivation (fold)
Zhongkemai 181	Field	1	564.88	77.28	1	1
	DS15	1	290.03	45.07	0.51	0.58
	DS30	1	198.33	31.77	0.35	0.41
	DS45	1	166	27.67	0.29	0.36
	PF	5	4041.65	679.4	7.15	8.79
Zhongkenuomai 258	Field	1	664.61	94.44	1	1
	DS15	1	306.11	45.95	0.46	0.49
	DS30	1	272.52	42.84	0.41	0.45
	DS45	1	191.38	31.06	0.29	0.33
	PF	5	10270.9	2227.75	15.45	23.59
Zhongkenuomai 2168	Field	1	550.8	82.68	1	1
	DS15	1	359.1	56.2	0.65	0.68
	DS30	1	253	39.29	0.46	0.48
	DS45	1	141	23.84	0.26	0.29
	PF	5	9687.5	2031.47	17.59	24.57
Zhongkezinuomai 168	Field	1	552.4	91.2	1	1
	DS15	1	271.6	46.85	0.49	0.51
	DS30	1	217	37.39	0.39	0.41
	DS45	1	197.67	32.85	0.36	0.36
	PF	5	3354.15	732.88	6.07	8.04

## Sheet: S6
Extended Data Table 6 | Statistical table of DIA identification and quantification results
Group	Peptides	Proteins
Z258-NS-M-1	80204	10481
Z258-NS-M-2	77628	10316
Z258-NS-M-3	80334	10386
Z258-NS-R-1	45530	7517
Z258-NS-R-2	51211	8085
Z258-NS-R-3	50392	7982
Z258-DS45-M-1	84614	10696
Z258-DS45-M-2	86919	10846
Z258-DS45-M-3	88390	10859
Z258-DS45-R-1	51216	8170
Z258-DS45-R-2	49583	7887
Z258-DS45-R-3	45589	7496
Z258-PF-M-1	68263	9577
Z258-PF-M-2	78335	10232
Z258-PF-M-3	69008	9640
Z258-PF-R-1	52912	8192
Z258-PF-R-2	59188	8698
Z258-PF-R-3	60190	8861

## Sheet: S7
Extended Data Table 7 | Statistical table of protein quantitative difference results
Comparisons	Significantly changing in abundance				Consistent presence/absence expression profile
	Upregulated	Downregulated	All		Upregulated	Downregulated
DS45-M vs NS-M	305	273	578		213	68
PF-M vs NS-M	232	447	679		92	281
DS45-R vs NS-R	63	78	141		218	225
PF-R vs NS-R	268	265	533		483	112

## Sheet: S8
Extended Data Table 8 | Differentially expressed proteins commonly identified in semi-mature seeds of Zhongkenuomai 258 between the 45-day delayed sowing vs field and speed breeding in plant factory vs field groups
Protein ID	Protein name	GO annotations	Pathways
A0A3B6N2K6	Phytocyanin domain-containing protein	GO:0009055(MF:electron transfer activity)
A0A3B6MPN0	Peptidase C14 caspase domain-containing protein	GO:0006508(BP:proteolysis);GO:0005737(CC:cytoplasm);GO:0004197(MF:cysteine-type endopeptidase activity)
W5BYH6	Uncharacterized protein	GO:0006397(BP:mRNA processing);GO:0006412(BP:translation);GO:0005737(CC:cytoplasm);GO:0005840(CC:ribosome);GO:0003729(MF:mRNA binding);GO:0003735(MF:structural constituent of ribosome)
A0A3B6PJI7	Fiber protein Fb15
A0A140KPU6	GA2ox-D7 protein	GO:0009416(BP:response to light stimulus);GO:0045487(BP:gibberellin catabolic process);GO:0046872(MF:metal ion binding);GO:0052634(MF:C-19 gibberellin 2-beta-dioxygenase activity)	ko00904(Diterpenoid biosynthesis)
A0A3B6JKS9	Peroxidase	GO:0006979(BP:response to oxidative stress);GO:0042744(BP:hydrogen peroxide catabolic process);GO:0005576(CC:extracellular region);GO:0020037(MF:heme binding);GO:0046872(MF:metal ion binding);GO:0140825(NA:NA)	ko00940(Phenylpropanoid biosynthesis)
A0A3B6KII1	SHSP domain-containing protein	GO:0009408(BP:response to heat)	ko04141(Protein processing in endoplasmic reticulum)
F4Y591	Heat shock protein 90	GO:0005524(MF:ATP binding);GO:0016887(MF:ATP hydrolysis activity);GO:0051082(MF:unfolded protein binding);GO:0140662(MF:ATP-dependent protein folding chaperone)	ko04141(Protein processing in endoplasmic reticulum);ko04151(PI3K-Akt signaling pathway);ko04217(Necroptosis);;;;;;;;;;;;;
A0A3B6H498	Cupin type-1 domain-containing protein	GO:0045735(MF:nutrient reservoir activity)
A0A3B6TMC3	Knottin scorpion toxin-like domain-containing protein	GO:0006952(BP:defense response)
A0A3B6FEX0	SHSP domain-containing protein	GO:0006457(BP:protein folding);GO:0009408(BP:response to heat);GO:0009651(BP:response to salt stress);GO:0042542(BP:response to hydrogen peroxide);GO:0051259(BP:protein complex oligomerization);GO:0043621(MF:protein self-association);GO:0051082(MF:unfolded protein binding)	ko04141(Protein processing in endoplasmic reticulum)
A0A3B6U2S4	SHSP domain-containing protein	GO:0006457(BP:protein folding);GO:0009408(BP:response to heat);GO:0009651(BP:response to salt stress);GO:0042542(BP:response to hydrogen peroxide);GO:0051259(BP:protein complex oligomerization);GO:0043621(MF:protein self-association);GO:0051082(MF:unfolded protein binding)	ko04141(Protein processing in endoplasmic reticulum)
A0A3B6JLR9	Uncharacterized protein	GO:0006457(BP:protein folding);GO:0009408(BP:response to heat);GO:0009651(BP:response to salt stress);GO:0042542(BP:response to hydrogen peroxide);GO:0051259(BP:protein complex oligomerization);GO:0043621(MF:protein self-association);GO:0051082(MF:unfolded protein binding)	ko04141(Protein processing in endoplasmic reticulum)
A0A077S4I0	RING-type domain-containing protein	GO:0046872(MF:metal ion binding)	ko03083(Polycomb repressive complex)
A0A1D6AQK1	Uncharacterized protein
A0A1D6S4Q1	Peptidyl-prolyl cis-trans isomerase	GO:0006457(BP:protein folding);GO:0005737(CC:cytoplasm);GO:0043231(CC:intracellular membrane-bounded organelle);GO:0003755(MF:peptidyl-prolyl cis-trans isomerase activity);GO:0016018(MF:cyclosporin A binding)
A0A2X0TUX4	non-specific serine/threonine protein kinase	GO:0009742(BP:brassinosteroid mediated signaling pathway);GO:0010262(BP:somatic embryogenesis);GO:0016310(BP:phosphorylation);GO:0040008(BP:regulation of growth);GO:0045089(BP:positive regulation of innate immune response);GO:1900150(BP:regulation of defense response to fungus);GO:0016020(CC:membrane);GO:0004674(MF:protein serine/threonine kinase activity);GO:0005524(MF:ATP binding)
A0A3B5Y3I9	Glyoxysomal processing protease, glyoxysomal	GO:0016485(BP:protein processing);GO:0005777(CC:peroxisome);GO:0004252(MF:serine-type endopeptidase activity)
A0A3B5Z4D4	Protein kinase domain-containing protein	GO:0016310(BP:phosphorylation);GO:0004672(MF:protein kinase activity);GO:0005524(MF:ATP binding)
A0A3B6A1Z7	CTP synthase	GO:0006241(BP:CTP biosynthetic process);GO:0006541(BP:glutamine metabolic process);GO:0019856(BP:pyrimidine nucleobase biosynthetic process);GO:0044210(BP:'de novo' CTP biosynthetic process);GO:0003883(MF:CTP synthase activity);GO:0005524(MF:ATP binding);GO:0042802(MF:identical protein binding)	ko01232(Nucleotide metabolism);ko01240(Biosynthesis of cofactors);ko00240(Pyrimidine metabolism)
A0A3B6C0V0	FAD-binding PCMH-type domain-containing protein	GO:0016491(MF:oxidoreductase activity);GO:0071949(MF:FAD binding)
A0A3B6C9T4	IBB domain-containing protein	GO:0006606(BP:protein import into nucleus);GO:0061608(MF:nuclear import signal receptor activity)
A0A3B6DK98	NB-ARC domain-containing protein	GO:0006952(BP:defense response);GO:0051707(BP:response to other organism);GO:0043531(MF:ADP binding)
A0A3B6EF21	Gamma carbonic anhydrase 1, mitochondrial	GO:0031966(CC:mitochondrial membrane)
A0A3B6ELP9	Heat shock protein 70	GO:0042026(BP:protein refolding);GO:0051085(BP:chaperone cofactor-dependent protein refolding);GO:0005737(CC:cytoplasm);GO:0005524(MF:ATP binding);GO:0016887(MF:ATP hydrolysis activity);GO:0031072(MF:heat shock protein binding);GO:0044183(MF:protein folding chaperone);GO:0140662(MF:ATP-dependent protein folding chaperone)	ko03040(Spliceosome);ko04141(Protein processing in endoplasmic reticulum);ko04010(MAPK signaling pathway);ko04144(Endocytosis);;;;;;;;
A0A3B6FIB9	Tryptophan synthase beta chain-like PALP domain-containing protein	GO:0019148(MF:D-cysteine desulfhydrase activity)
A0A3B6FZ33	Uncharacterized protein	GO:0005975(BP:carbohydrate metabolic process);GO:0009507(CC:chloroplast);GO:0008422(MF:beta-glucosidase activity);GO:0102726(MF:DIMBOA glucoside beta-D-glucosidase activity)	ko00500(Starch and sucrose metabolism);ko00460(Cyanoamino acid metabolism);ko00999(Biosynthesis of various plant secondary metabolites)
A0A3B6H0T4	F-box domain-containing protein
A0A3B6HPS6	FAD-binding domain-containing protein	GO:0016491(MF:oxidoreductase activity);GO:0071949(MF:FAD binding)
A0A3B6HW16	ATP-dependent Clp protease proteolytic subunit	GO:0006515(BP:protein quality control for misfolded or incompletely synthesized proteins);GO:0009368(CC:endopeptidase Clp complex);GO:0009536(CC:plastid);GO:0004176(MF:ATP-dependent peptidase activity);GO:0004252(MF:serine-type endopeptidase activity);GO:0051117(MF:ATPase binding)
A0A3B6IM04	Uncharacterized protein
A0A3B6IRD6	Uncoupling protein	GO:0006839(BP:mitochondrial transport);GO:0015711(BP:organic anion transport);GO:0015748(BP:organophosphate ester transport);GO:0071705(BP:nitrogen compound transport);GO:1990542(BP:mitochondrial transmembrane transport);GO:0031966(CC:mitochondrial membrane);GO:0017077(MF:oxidative phosphorylation uncoupler activity)
A0A3B6KJT2	RING-CH-type domain-containing protein	GO:0016020(CC:membrane);GO:0008270(MF:zinc ion binding)
A0A3B6LS14	Cupin type-1 domain-containing protein
A0A3B6LS44	C2H2-type domain-containing protein	GO:0005634(CC:nucleus);GO:0003700(MF:DNA-binding transcription factor activity)
A0A3B6MXD9	Benzyl alcohol O-benzoyltransferase	GO:0016747(MF:acyltransferase activity, transferring groups other than amino-acyl groups)
A0A3B6N1S8	Transcription factor CBF/NF-Y/archaeal histone domain-containing protein	GO:0006355(BP:regulation of transcription, DNA-templated);GO:0005634(CC:nucleus);GO:0000976(MF:transcription cis-regulatory region binding);GO:0046982(MF:protein heterodimerization activity)
A0A3B6PME4	DUF1618 domain-containing protein
A0A3B6PSD8	50S ribosomal protein L13	GO:0006412(BP:translation);GO:0017148(BP:negative regulation of translation);GO:0005762(CC:mitochondrial large ribosomal subunit);GO:0005840(CC:ribosome);GO:0003729(MF:mRNA binding);GO:0003735(MF:structural constituent of ribosome)	ko03010(Ribosome)
A0A3B6QMN1	Fe2OG dioxygenase domain-containing protein	GO:0016491(MF:oxidoreductase activity);GO:0046872(MF:metal ion binding)
A0A3B6QNK0	SWIRM domain-containing protein	GO:0006325(BP:chromatin organization);GO:0071704(BP:organic substance metabolic process);GO:0016491(MF:oxidoreductase activity);GO:0050660(MF:flavin adenine dinucleotide binding)
A0A3B6RSB2	Secondary thiamine-phosphate synthase enzyme
A0A3B6SDQ5	GRIP domain-containing protein
A0A3B6SE83	Protein-L-isoaspartate O-methyltransferase	GO:0032259(BP:methylation);GO:0036211(BP:protein modification process);GO:0004719(MF:protein-L-isoaspartate (D-aspartate) O-methyltransferase activity)
A0A3B6SJ75	Aldehyde dehydrogenase domain-containing protein	GO:0070887(BP:cellular response to chemical stimulus);GO:0004029(MF:aldehyde dehydrogenase (NAD+) activity)	ko00940(Phenylpropanoid biosynthesis)
G9I0U4	Avenin-like protein	GO:0045735(MF:nutrient reservoir activity)
P30111	Glutathione S-transferase 2	GO:0006749(BP:glutathione metabolic process);GO:0042221(BP:response to chemical);GO:0005737(CC:cytoplasm);GO:0004364(MF:glutathione transferase activity);GO:0043295(MF:glutathione binding)	ko00480(Glutathione metabolism);ko00980(Metabolism of xenobiotics by cytochrome P450);ko00982(Drug metabolism - cytochrome P450);ko00983(Drug metabolism - other enzymes);;;;;;;;
R4JAT4	Low-molecular-weight glutenin subunit (Fragment)	GO:0045735(MF:nutrient reservoir activity)
W5D4Z8	GHMP kinase N-terminal domain-containing protein	GO:0016114(BP:terpenoid biosynthetic process);GO:0005524(MF:ATP binding);GO:0050515(MF:4-(cytidine 5'-diphospho)-2-C-methyl-D-erythritol kinase activity)	ko00900(Terpenoid backbone biosynthesis)
A0A077RQ83	Bifunctional inhibitor/plant lipid transfer protein/seed storage helical domain-containing protein	GO:0005576(CC:extracellular region);GO:0004867(MF:serine-type endopeptidase inhibitor activity)
A0A077RQN6	Uncharacterized protein	GO:0016410(MF:N-acyltransferase activity)
A0A077S237	VIP1 protein	GO:0016020(CC:membrane)
A0A1D5UQZ1	Uncharacterized protein
A0A3B5ZVW8	Uncharacterized protein
A0A3B6AVD7	PI31 proteasome regulator N-terminal domain-containing protein	GO:0006511(BP:ubiquitin-dependent protein catabolic process);GO:0019222(BP:regulation of metabolic process);GO:0043161(BP:proteasome-mediated ubiquitin-dependent protein catabolic process);GO:0000502(CC:proteasome complex);GO:0004866(MF:endopeptidase inhibitor activity);GO:0070628(MF:proteasome binding)	ko03050(Proteasome)
A0A3B6B4H8	DUF642 domain-containing protein
A0A3B6GLT0	DUF674 family protein
A0A3B6JCW8	AMP-activated protein kinase glycogen-binding domain-containing protein	GO:0009507(CC:chloroplast)
A0A3B6QB66	Proline-rich protein
A0A3B6REX8	O-fucosyltransferase family protein	GO:0006004(BP:fucose metabolic process);GO:0016020(CC:membrane);GO:0016740(MF:transferase activity)
A0A3B6TIH4	Uncharacterized protein	GO:0016020(CC:membrane)
A0A9R1DZQ7	Ig-like domain-containing protein
P08453	Gamma-gliadin	GO:0045735(MF:nutrient reservoir activity)
Note: Protein IDs with a light yellow background indicate significantly up-regulated proteins, those with a light blue background indicate significantly down-regulated proteins, those with a burgundy background indicate newly appeared proteins, and those with a blue background indicate disappeared proteins.

## Sheet: S9
Extended Data Table 9 | Differentially expressed proteins commonly identified in mature seeds of Zhongkenuomai 258 between the 45-day delayed sowing vs field and speed breeding in plant factory vs field groups
Protein ID	Protein name	GO annotations	Pathways
A0A3B6LGV9	Histone H2B	GO:0000786(CC:nucleosome);GO:0005634(CC:nucleus);GO:0003677(MF:DNA binding);GO:0030527(MF:structural constituent of chromatin);GO:0046982(MF:protein heterodimerization activity)
A0A3B6ST91	Histone H2A	GO:0000786(CC:nucleosome);GO:0005634(CC:nucleus);GO:0003677(MF:DNA binding);GO:0030527(MF:structural constituent of chromatin);GO:0046982(MF:protein heterodimerization activity)	ko03082(ATP-dependent chromatin remodeling);ko04217(Necroptosis);;;
A0A3B6EUA2	Glucan endo-1,3-beta-D-glucosidase	GO:0005975(BP:carbohydrate metabolic process);GO:0004553(MF:hydrolase activity, hydrolyzing O-glycosyl compounds)
A0A3B6PRJ1	Phytocyanin domain-containing protein	GO:0009055(MF:electron transfer activity)
A0A3B6GPS8	Bowman-Birk serine protease inhibitors family domain-containing protein	GO:0005576(CC:extracellular region);GO:0004867(MF:serine-type endopeptidase inhibitor activity)
A0A3B6RHZ0	Peroxidase	GO:0006979(BP:response to oxidative stress);GO:0042744(BP:hydrogen peroxide catabolic process);GO:0005576(CC:extracellular region);GO:0009505(CC:plant-type cell wall);GO:0004601(MF:peroxidase activity);GO:0020037(MF:heme binding);GO:0046872(MF:metal ion binding);GO:0140825(NA:NA)	ko00940(Phenylpropanoid biosynthesis)
A0A3B6SFH1	Peroxidase	GO:0006979(BP:response to oxidative stress);GO:0042744(BP:hydrogen peroxide catabolic process);GO:0005576(CC:extracellular region);GO:0009505(CC:plant-type cell wall);GO:0004601(MF:peroxidase activity);GO:0020037(MF:heme binding);GO:0046872(MF:metal ion binding);GO:0140825(NA:NA)	ko00940(Phenylpropanoid biosynthesis)
A1YE34	Ribosomal protein L3-B2	GO:0006412(BP:translation);GO:0022625(CC:cytosolic large ribosomal subunit);GO:0003723(MF:RNA binding);GO:0003735(MF:structural constituent of ribosome)	ko03010(Ribosome);
W5CQE4	Heme-binding protein 2	GO:0110165(CC:cellular anatomical entity)
A0A3B6QC26	Suppressor of forked domain-containing protein	GO:0000395(BP:mRNA 5'-splice site recognition);GO:0000243(CC:commitment complex);GO:0005685(CC:U1 snRNP);GO:0071004(CC:U2-type prespliceosome)
A0A3B6ASH8	Thaumatin-like protein	GO:0006952(BP:defense response)
Q0Q5D9	Globulin 1
J3RHG6	Beta-glucosidase 4 (Fragment)	GO:0005975(BP:carbohydrate metabolic process);GO:0009507(CC:chloroplast);GO:0008422(MF:beta-glucosidase activity);GO:0102726(MF:DIMBOA glucoside beta-D-glucosidase activity)	ko00500(Starch and sucrose metabolism);ko00460(Cyanoamino acid metabolism);ko00946(Degradation of flavonoids);ko00999(Biosynthesis of various plant secondary metabolites)
Q2PCC5	Type 2 non specific lipid transfer protein	GO:0006869(BP:lipid transport)
A0A3B6EMV1	tRNA-binding domain-containing protein	GO:0000049(MF:tRNA binding)
A0A077RPF9	Peroxidase	GO:0006979(BP:response to oxidative stress);GO:0042744(BP:hydrogen peroxide catabolic process);GO:0005576(CC:extracellular region);GO:0009505(CC:plant-type cell wall);GO:0004601(MF:peroxidase activity);GO:0020037(MF:heme binding);GO:0046872(MF:metal ion binding);GO:0140825(NA:NA)	ko00940(Phenylpropanoid biosynthesis)
A0A077RSR1	Enoyl reductase (ER) domain-containing protein	GO:0016628(MF:oxidoreductase activity, acting on the CH-CH group of donors, NAD or NADP as acceptor);GO:0046872(MF:metal ion binding)	ko00590(Arachidonic acid metabolism)
A0A077RUE1	Uncharacterized protein
A0A077S097	protein-serine/threonine phosphatase	GO:0017018(MF:myosin phosphatase activity)
A0A077S0N3	AAA+ ATPase domain-containing protein	GO:0006508(BP:proteolysis);GO:0009534(CC:chloroplast thylakoid);GO:0016020(CC:membrane);GO:0004176(MF:ATP-dependent peptidase activity);GO:0004222(MF:metalloendopeptidase activity);GO:0005524(MF:ATP binding);GO:0016887(MF:ATP hydrolysis activity)	ko04139(Mitophagy - yeast)
A0A077S662	Bifunctional inhibitor/plant lipid transfer protein/seed storage helical domain-containing protein	GO:0009627(BP:systemic acquired resistance);GO:0005504(MF:fatty acid binding)
A0A0P0KDX1	3-phosphoshikimate 1-carboxyvinyltransferase (Fragment)	GO:0008652(BP:cellular amino acid biosynthetic process);GO:0009073(BP:aromatic amino acid family biosynthetic process);GO:0009423(BP:chorismate biosynthetic process);GO:0003866(MF:3-phosphoshikimate 1-carboxyvinyltransferase activity)	ko00400(Phenylalanine, tyrosine and tryptophan biosynthesis)
A0A1D5ULT3	H15 domain-containing protein	GO:0006334(BP:nucleosome assembly);GO:0030261(BP:chromosome condensation);GO:0045910(BP:negative regulation of DNA recombination);GO:0000786(CC:nucleosome);GO:0005634(CC:nucleus);GO:0003690(MF:double-stranded DNA binding);GO:0030527(MF:structural constituent of chromatin);GO:0031492(MF:nucleosomal DNA binding)
A0A1D5UPN7	galactinol--sucrose galactosyltransferase	GO:0005975(BP:carbohydrate metabolic process)
A0A1D5VRC2	Uncharacterized protein	GO:0005975(BP:carbohydrate metabolic process);GO:0004553(MF:hydrolase activity, hydrolyzing O-glycosyl compounds)	ko00052(Galactose metabolism);ko00500(Starch and sucrose metabolism)
A0A1D6CRV7	NADH dehydrogenase [ubiquinone] 1 beta subcomplex subunit 2	GO:0005747(CC:mitochondrial respiratory chain complex I)
A0A1D6RPJ3	Uncharacterized protein
A0A1S6KXQ3	Ferredoxin--nitrite reductase, chloroplastic	GO:0016491(MF:oxidoreductase activity);GO:0020037(MF:heme binding);GO:0046872(MF:metal ion binding);GO:0051539(MF:4 iron, 4 sulfur cluster binding)	ko00910(Nitrogen metabolism)
A0A3B5XYC5	K Homology domain-containing protein	GO:0003723(MF:RNA binding)	ko04216(Ferroptosis)
A0A3B5Y0P3	Uncharacterized protein	GO:0098542(BP:defense response to other organism);GO:0009506(CC:plasmodesma);GO:0016020(CC:membrane)
A0A3B5Y307	Protein GPR107	GO:0005794(CC:Golgi apparatus);GO:0016020(CC:membrane)
A0A3B5Y4S1	Uncharacterized protein	GO:0010150(BP:leaf senescence)
A0A3B5YU78	Cytochrome P450	GO:0016020(CC:membrane);GO:0004497(MF:monooxygenase activity);GO:0005506(MF:iron ion binding);GO:0016705(MF:oxidoreductase activity, acting on paired donors, with incorporation or reduction of molecular oxygen);GO:0020037(MF:heme binding)
A0A3B5Z5F1	Eukaryotic translation initiation factor 3 subunit D	GO:0001732(BP:formation of cytoplasmic translation initiation complex);GO:0002191(BP:cap-dependent translational initiation);GO:0006413(BP:translational initiation);GO:0005852(CC:eukaryotic translation initiation factor 3 complex);GO:0016282(CC:eukaryotic 43S preinitiation complex);GO:0033290(CC:eukaryotic 48S preinitiation complex);GO:0003743(MF:translation initiation factor activity);GO:0098808…
A0A3B5ZVF3	Ribosomal protein	GO:0000470(BP:maturation of LSU-rRNA);GO:0006412(BP:translation);GO:0022625(CC:cytosolic large ribosomal subunit);GO:0003723(MF:RNA binding);GO:0003735(MF:structural constituent of ribosome);GO:0019843(MF:rRNA binding)	ko03010(Ribosome)
A0A3B5ZZM1	Histone-lysine N-methyltransferase	GO:0005634(CC:nucleus);GO:0005694(CC:chromosome);GO:0003690(MF:double-stranded DNA binding);GO:0008270(MF:zinc ion binding);GO:0042054(MF:histone methyltransferase activity)	ko00310(Lysine degradation);
A0A3B6A0Y0	Phosphotransferase	GO:0001678(BP:cellular glucose homeostasis);GO:0006006(BP:glucose metabolic process);GO:0006096(BP:glycolytic process);GO:0046835(BP:carbohydrate phosphorylation);GO:0051156(BP:glucose 6-phosphate metabolic process);GO:0005739(CC:mitochondrion);GO:0005829(CC:cytosol);GO:0004340(MF:glucokinase activity);GO:0005524(MF:ATP binding);GO:0005536(MF:glucose binding);GO:0008865(MF:fructokinase activity)	ko01250(Biosynthesis of nucleotide sugars);ko00010(Glycolysis / Gluconeogenesis);ko00051(Fructose and mannose metabolism);ko00052(Galactose metabolism);ko00500(Starch and sucrose metabolism);ko00520(Amino sugar and nucleotide sugar metabolism);ko00521(Streptomycin biosynthesis);ko00524(Neomycin, kanamycin and gentamicin biosynthesis);ko04066(HIF-1 signaling pathway);;;;;
A0A3B6A2B1	Uncharacterized protein	GO:0016020(CC:membrane)
A0A3B6AQY3	Acetyl-CoA C-acetyltransferase	GO:0006635(BP:fatty acid beta-oxidation);GO:0005739(CC:mitochondrion);GO:0005777(CC:peroxisome);GO:0003985(MF:acetyl-CoA C-acetyltransferase activity)	ko00620(Pyruvate metabolism);ko00630(Glyoxylate and dicarboxylate metabolism);ko00650(Butanoate metabolism);ko00720(Carbon fixation pathways in prokaryotes);ko00071(Fatty acid degradation);ko00280(Valine, leucine and isoleucine degradation);ko00310(Lysine degradation);ko00380(Tryptophan metabolism);ko00900(Terpenoid backbone biosynthesis);ko00362(Benzoate degradation);ko02020(Two-component system…
A0A3B6ASF8	3-deoxy-8-phosphooctulonate synthase	GO:0046364(BP:monosaccharide biosynthetic process);GO:0005829(CC:cytosol);GO:0008676(MF:3-deoxy-8-phosphooctulonate synthase activity)	ko01250(Biosynthesis of nucleotide sugars);ko00540(Lipopolysaccharide biosynthesis)
A0A3B6AX40	MI domain-containing protein	GO:0016281(CC:eukaryotic translation initiation factor 4F complex);GO:0003729(MF:mRNA binding);GO:0003743(MF:translation initiation factor activity)
A0A3B6AX99	ribose-5-phosphate isomerase	GO:0009052(BP:pentose-phosphate shunt, non-oxidative branch);GO:0004751(MF:ribose-5-phosphate isomerase activity)	ko00030(Pentose phosphate pathway);ko00710(Carbon fixation in photosynthetic organisms)
A0A3B6B4P3	Tyrosinase copper-binding domain-containing protein	GO:0046148(BP:pigment biosynthetic process);GO:0004097(MF:catechol oxidase activity);GO:0046872(MF:metal ion binding)	ko00350(Tyrosine metabolism);ko00950(Isoquinoline alkaloid biosynthesis)
A0A3B6BYK7	Cytochrome P450	GO:0016020(CC:membrane);GO:0004497(MF:monooxygenase activity);GO:0005506(MF:iron ion binding);GO:0016705(MF:oxidoreductase activity, acting on paired donors, with incorporation or reduction of molecular oxygen);GO:0020037(MF:heme binding)
A0A3B6C084	Pectinesterase	GO:0042545(BP:cell wall modification);GO:0045490(BP:pectin catabolic process);GO:0030599(MF:pectinesterase activity);GO:0045330(MF:aspartyl esterase activity);GO:0046910(MF:pectinesterase inhibitor activity)	ko00040(Pentose and glucuronate interconversions);ko02020(Two-component system)
A0A3B6C331	Uncharacterized protein
A0A3B6D6H1	Uncharacterized protein
A0A3B6DBW8	FAD-binding PCMH-type domain-containing protein	GO:0016491(MF:oxidoreductase activity);GO:0071949(MF:FAD binding)
A0A3B6DI89	Bifunctional inhibitor/plant lipid transfer protein/seed storage helical domain-containing protein
A0A3B6DLF1	Plastid lipid-associated protein/fibrillin conserved domain-containing protein
A0A3B6DQ80	Glycosyltransferase 2-like domain-containing protein	GO:0071555(BP:cell wall organization);GO:0000139(CC:Golgi membrane);GO:0005794(CC:Golgi apparatus);GO:0051753(MF:mannan synthase activity)
A0A3B6EA70	Glucose-induced degradation protein 4 homolog	GO:0006623(BP:protein targeting to vacuole);GO:0007039(BP:protein catabolic process in the vacuole);GO:0043161(BP:proteasome-mediated ubiquitin-dependent protein catabolic process);GO:0045721(BP:negative regulation of gluconeogenesis);GO:0005773(CC:vacuole);GO:0034657(CC:GID complex)
A0A3B6EB06	Pectinesterase inhibitor domain-containing protein
A0A3B6EB25	Knottin scorpion toxin-like domain-containing protein
A0A3B6EBC9	DUF6598 domain-containing protein
A0A3B6EFV0	RRM domain-containing protein	GO:0003723(MF:RNA binding)	ko03040(Spliceosome);
A0A3B6EGK6	Btz domain-containing protein	GO:0000184(BP:nuclear-transcribed mRNA catabolic process, nonsense-mediated decay);GO:0006397(BP:mRNA processing);GO:0006417(BP:regulation of translation);GO:0008380(BP:RNA splicing);GO:0051028(BP:mRNA transport);GO:0005737(CC:cytoplasm);GO:0035145(CC:exon-exon junction complex);GO:0003729(MF:mRNA binding)
A0A3B6EI46	Subtilisin-like protease	GO:0006508(BP:proteolysis);GO:0004252(MF:serine-type endopeptidase activity)
A0A3B6EQF5	Leucine-rich repeat-containing N-terminal plant-type domain-containing protein
A0A3B6FXU0	RRM domain-containing protein	GO:0005634(CC:nucleus);GO:0003723(MF:RNA binding)	ko03013(Nucleocytoplasmic transport);ko03015(mRNA surveillance pathway)
A0A3B6GJY0	GDSL esterase/lipase	GO:0016788(MF:hydrolase activity, acting on ester bonds)
A0A3B6GV04	NAD(P)-binding domain-containing protein
A0A3B6H3P5	Peroxidase	GO:0006979(BP:response to oxidative stress);GO:0042744(BP:hydrogen peroxide catabolic process);GO:0005576(CC:extracellular region);GO:0009505(CC:plant-type cell wall);GO:0004601(MF:peroxidase activity);GO:0020037(MF:heme binding);GO:0046872(MF:metal ion binding);GO:0140825(NA:NA)	ko00940(Phenylpropanoid biosynthesis)
A0A3B6HMS7	Phytocyanin domain-containing protein	GO:0016020(CC:membrane);GO:0009055(MF:electron transfer activity)
A0A3B6HRR0	Uncharacterized protein
A0A3B6HW36	Uncharacterized protein
A0A3B6HYI8	SREBP regulating gene protein	GO:2000640(BP:positive regulation of SREBP signaling pathway);GO:0005794(CC:Golgi apparatus);GO:0016020(CC:membrane)
A0A3B6HZH7	AB hydrolase-1 domain-containing protein	GO:0016787(MF:hydrolase activity)
A0A3B6IL23	Pescadillo homolog	GO:0000463(BP:maturation of LSU-rRNA from tricistronic rRNA transcript (SSU-rRNA, 5.8S rRNA, LSU-rRNA));GO:0000466(BP:maturation of 5.8S rRNA from tricistronic rRNA transcript (SSU-rRNA, 5.8S rRNA, LSU-rRNA));GO:0005654(CC:nucleoplasm);GO:0030687(CC:preribosome, large subunit precursor);GO:0070545(CC:PeBoW complex);GO:0003723(MF:RNA binding);GO:0043021(MF:ribonucleoprotein complex binding)
A0A3B6JEU6	X8 domain-containing protein	GO:0005975(BP:carbohydrate metabolic process);GO:0042973(MF:glucan endo-1,3-beta-D-glucosidase activity)
A0A3B6JH52	DNA polymerase	GO:0006260(BP:DNA replication);GO:0005634(CC:nucleus);GO:0000166(MF:nucleotide binding);GO:0003677(MF:DNA binding);GO:0003887(MF:DNA-directed DNA polymerase activity);GO:0046872(MF:metal ion binding);GO:0051539(MF:4 iron, 4 sulfur cluster binding)	ko03030(DNA replication);ko03410(Base excision repair);ko03420(Nucleotide excision repair);ko03430(Mismatch repair);ko03440(Homologous recombination)
A0A3B6JIC7	TPX2 C-terminal domain-containing protein	GO:0005737(CC:cytoplasm);GO:0005856(CC:cytoskeleton);GO:0008017(MF:microtubule binding)
A0A3B6JP80	Flavin-containing monooxygenase	GO:0004499(MF:N,N-dimethylaniline monooxygenase activity);GO:0050660(MF:flavin adenine dinucleotide binding);GO:0050661(MF:NADP binding)
A0A3B6KFP7	B30.2/SPRY domain-containing protein	GO:0048188(CC:Set1C/COMPASS complex);GO:0000976(MF:transcription cis-regulatory region binding)
A0A3B6KNK6	Photosystem I reaction center subunit III	GO:0015979(BP:photosynthesis);GO:0009538(CC:photosystem I reaction center);GO:0009543(CC:chloroplast thylakoid lumen)	ko00195(Photosynthesis)
A0A3B6KNV4	Uncharacterized protein	GO:0009723(BP:response to ethylene);GO:0010104(BP:regulation of ethylene-activated signaling pathway);GO:0005783(CC:endoplasmic reticulum);GO:0005794(CC:Golgi apparatus);GO:0016020(CC:membrane)
A0A3B6KRF3	Hydroxymethylglutaryl-CoA synthase	GO:0006084(BP:acetyl-CoA metabolic process);GO:0010142(BP:farnesyl diphosphate biosynthetic process, mevalonate pathway);GO:0016126(BP:sterol biosynthetic process);GO:0004421(MF:hydroxymethylglutaryl-CoA synthase activity)	ko00650(Butanoate metabolism);ko00280(Valine, leucine and isoleucine degradation);ko00900(Terpenoid backbone biosynthesis);
A0A3B6LG71	leucine--tRNA ligase	GO:0006429(BP:leucyl-tRNA aminoacylation);GO:0009791(BP:post-embryonic development);GO:0048608(BP:reproductive structure development);GO:0002161(MF:aminoacyl-tRNA editing activity);GO:0004823(MF:leucine-tRNA ligase activity);GO:0005524(MF:ATP binding)	ko00970(Aminoacyl-tRNA biosynthesis)
A0A3B6LMW5	formate--tetrahydrofolate ligase	GO:0035999(BP:tetrahydrofolate interconversion);GO:0004329(MF:formate-tetrahydrofolate ligase activity);GO:0005524(MF:ATP binding)	ko01240(Biosynthesis of cofactors);ko00720(Carbon fixation pathways in prokaryotes);ko00670(One carbon pool by folate)
A0A3B6LWA6	Uncharacterized protein	GO:0000481(BP:maturation of 5S rRNA);GO:0045292(BP:mRNA cis splicing, via spliceosome);GO:0046540(CC:U4/U6 x U5 tri-snRNP complex)	ko03040(Spliceosome)
A0A3B6MP07	WH1 domain-containing protein	GO:0000290(BP:deadenylation-dependent decapping of nuclear-transcribed mRNA);GO:0031087(BP:deadenylation-independent decapping of nuclear-transcribed mRNA);GO:0000932(CC:P-body);GO:0003729(MF:mRNA binding);GO:0008047(MF:enzyme activator activity)	ko03018(RNA degradation)
A0A3B6MQ11	Myb/SANT-like domain-containing protein
A0A3B6MSG8	Aminotransferase class I/classII domain-containing protein	GO:0009058(BP:biosynthetic process);GO:0005737(CC:cytoplasm);GO:0016212(MF:kynurenine-oxoglutarate transaminase activity);GO:0030170(MF:pyridoxal phosphate binding)
A0A3B6MSX6	Uncharacterized protein
A0A3B6MW45	Metallo-beta-lactamase domain-containing protein
A0A3B6N2Z9	NAD-dependent epimerase/dehydratase domain-containing protein	GO:0016616(MF:oxidoreductase activity, acting on the CH-OH group of donors, NAD or NADP as acceptor)
A0A3B6NK32	4-coumarate--CoA ligase	GO:0009698(BP:phenylpropanoid metabolic process);GO:0016207(MF:4-coumarate-CoA ligase activity);GO:0106290(MF:trans-cinnamate-CoA ligase activity)
A0A3B6NL13	O-fucosyltransferase family protein	GO:0006004(BP:fucose metabolic process);GO:0016020(CC:membrane);GO:0016740(MF:transferase activity)
A0A3B6NPN1	Uncharacterized protein	GO:0019752(BP:carboxylic acid metabolic process);GO:0003824(MF:catalytic activity)	ko01240(Biosynthesis of cofactors);ko00790(Folate biosynthesis)
A0A3B6NQY2	Clp R domain-containing protein	GO:0034605(BP:cellular response to heat);GO:0005737(CC:cytoplasm);GO:0005524(MF:ATP binding);GO:0016887(MF:ATP hydrolysis activity)
A0A3B6NRW4	Ribosomal RNA-processing protein 14/surfeit locus protein 6 C-terminal domain-containing protein	GO:0042273(BP:ribosomal large subunit biogenesis);GO:0042274(BP:ribosomal small subunit biogenesis);GO:0005730(CC:nucleolus);GO:0003677(MF:DNA binding);GO:0003723(MF:RNA binding)
A0A3B6NSF0	Phosphoribulokinase	GO:0019253(BP:reductive pentose-phosphate cycle);GO:0005737(CC:cytoplasm);GO:0005524(MF:ATP binding);GO:0008974(MF:phosphoribulokinase activity)	ko00710(Carbon fixation in photosynthetic organisms)
A0A3B6NX94	ABC transporter domain-containing protein	GO:0005524(MF:ATP binding);GO:0016887(MF:ATP hydrolysis activity)	ko03018(RNA degradation)
A0A3B6NYA1	SAWADEE domain-containing protein	GO:0005634(CC:nucleus);GO:0003677(MF:DNA binding);GO:0003682(MF:chromatin binding)
A0A3B6PDN6	Uncharacterized protein
A0A3B6PHC4	Autophagy protein 5	GO:0000045(BP:autophagosome assembly);GO:0000422(BP:autophagy of mitochondrion);GO:0006995(BP:cellular response to nitrogen starvation);GO:0044804(BP:autophagy of nucleus);GO:0034045(CC:phagophore assembly site membrane);GO:0034274(CC:Atg12-Atg5-Atg16 complex)	ko04140(Autophagy - animal);ko04138(Autophagy - yeast);ko04136(Autophagy - other);ko04216(Ferroptosis);;;;;
A0A3B6PK93	protein-serine/threonine phosphatase	GO:0004722(MF:protein serine/threonine phosphatase activity);GO:0017018(MF:myosin phosphatase activity);GO:0046872(MF:metal ion binding)
A0A3B6PMR1	GDSL esterase/lipase	GO:0016788(MF:hydrolase activity, acting on ester bonds)
A0A3B6PMZ4	Enoyl reductase (ER) domain-containing protein	GO:0008270(MF:zinc ion binding);GO:0016491(MF:oxidoreductase activity)	ko00010(Glycolysis / Gluconeogenesis);ko00620(Pyruvate metabolism);ko00071(Fatty acid degradation);ko00350(Tyrosine metabolism);ko00830(Retinol metabolism);ko00625(Chloroalkane and chloroalkene degradation);ko00626(Naphthalene degradation);ko00980(Metabolism of xenobiotics by cytochrome P450);ko00982(Drug metabolism - cytochrome P450)
A0A3B6QM73	Pentacotripeptide-repeat region of PRORP domain-containing protein
A0A3B6QPG7	Transmembrane protein
A0A3B6R9A6	NAD(+) diphosphatase	GO:0006734(BP:NADH metabolic process);GO:0006742(BP:NADP catabolic process);GO:0019677(BP:NAD catabolic process);GO:0000210(MF:NAD+ diphosphatase activity);GO:0035529(MF:NADH pyrophosphatase activity);GO:0046872(MF:metal ion binding)	ko00760(Nicotinate and nicotinamide metabolism);ko04146(Peroxisome)
A0A3B6RFL9	Acyl carrier protein	GO:0006633(BP:fatty acid biosynthetic process)	ko00190(Oxidative phosphorylation);;;;;;;;;;;
A0A3B6RIC0	Protein kinase domain-containing protein	GO:0004672(MF:protein kinase activity);GO:0005524(MF:ATP binding)
A0A3B6RK03	tyrosine--tRNA ligase	GO:0006418(BP:tRNA aminoacylation for protein translation);GO:0004831(MF:tyrosine-tRNA ligase activity);GO:0005524(MF:ATP binding)	ko00970(Aminoacyl-tRNA biosynthesis)
A0A3B6RLP6	Knottin scorpion toxin-like domain-containing protein
A0A3B6RMT6	Protein kinase domain-containing protein	GO:0016310(BP:phosphorylation);GO:0035556(BP:intracellular signal transduction);GO:0005634(CC:nucleus);GO:0005737(CC:cytoplasm);GO:0004683(MF:calmodulin-dependent protein kinase activity);GO:0005516(MF:calmodulin binding);GO:0005524(MF:ATP binding);GO:0009931(MF:calcium-dependent protein serine/threonine kinase activity)
A0A3B6RSD0	U3 small nucleolar RNA-associated protein 15 C-terminal domain-containing protein	GO:0006364(BP:rRNA processing);GO:0045943(BP:positive regulation of transcription by RNA polymerase I);GO:0005730(CC:nucleolus)	ko03008(Ribosome biogenesis in eukaryotes)
A0A3B6RSF8	Carbonic anhydrase	GO:0006730(BP:one-carbon metabolic process);GO:0004089(MF:carbonate dehydratase activity);GO:0008270(MF:zinc ion binding);GO:0016836(MF:hydro-lyase activity)	ko00910(Nitrogen metabolism)
A0A3B6SDC8	NAC domain-containing protein	GO:0006355(BP:regulation of transcription, DNA-templated);GO:0005634(CC:nucleus);GO:0016020(CC:membrane);GO:0003677(MF:DNA binding)
A0A3B6SGA2	DDHD domain-containing protein	GO:0005737(CC:cytoplasm);GO:0004620(MF:phospholipase activity);GO:0046872(MF:metal ion binding)
A0A3B6SHL1	TMPIT-like protein	GO:0016020(CC:membrane)
A0A3B6SLF6	DNA polymerase alpha subunit B	GO:0006260(BP:DNA replication);GO:0005634(CC:nucleus);GO:0003677(MF:DNA binding)	ko03030(DNA replication)
A0A3B6SM15	Bms1-type G domain-containing protein	GO:0000462(BP:maturation of SSU-rRNA from tricistronic rRNA transcript (SSU-rRNA, 5.8S rRNA, LSU-rRNA));GO:0000479(BP:endonucleolytic cleavage of tricistronic rRNA transcript (SSU-rRNA, 5.8S rRNA, LSU-rRNA));GO:0005730(CC:nucleolus);GO:0030688(CC:preribosome, small subunit precursor);GO:0003924(MF:GTPase activity);GO:0005525(MF:GTP binding);GO:0034511(MF:U3 snoRNA binding)
A0A3B6SQB6	Carboxypeptidase	GO:0006508(BP:proteolysis);GO:0004185(MF:serine-type carboxypeptidase activity)
A0A3B6TAS8	Homeodomain-like transcription factor superfamily protein	GO:0005634(CC:nucleus);GO:0003677(MF:DNA binding);GO:0004386(MF:helicase activity);GO:0005524(MF:ATP binding);GO:0046872(MF:metal ion binding);GO:0140658(MF:ATP-dependent chromatin remodeler activity)	ko03082(ATP-dependent chromatin remodeling);;
A0A3B6TJD2	Uncharacterized protein	GO:0016747(MF:acyltransferase activity, transferring groups other than amino-acyl groups)
A0A3B6U4X7	Pectate lyase superfamily protein domain-containing protein	GO:0005975(BP:carbohydrate metabolic process);GO:0004650(MF:polygalacturonase activity)
A0A3B6U9T2	Phosphomannomutase	GO:0006013(BP:mannose metabolic process);GO:0006487(BP:protein N-linked glycosylation);GO:0009298(BP:GDP-mannose biosynthetic process);GO:0005829(CC:cytosol);GO:0004615(MF:phosphomannomutase activity);GO:0046872(MF:metal ion binding)	ko01250(Biosynthesis of nucleotide sugars);ko01240(Biosynthesis of cofactors);ko00051(Fructose and mannose metabolism);ko00520(Amino sugar and nucleotide sugar metabolism)
A0A9R1FQ99	Aminopeptidase	GO:0016020(CC:membrane)
A0A9R1GK60	Agenet domain-containing protein
D3YHS3	RNA-binding Ras-GAP SH3 binding protein (Fragment)	GO:0005737(CC:cytoplasm);GO:0043229(CC:intracellular organelle);GO:0003723(MF:RNA binding)
Q41523	Secretory protein
Q9SDM2	Glutenin, high molecular weight subunit type y	GO:0045735(MF:nutrient reservoir activity)
W5C5P6	GH10 domain-containing protein	GO:0005975(BP:carbohydrate metabolic process);GO:0110165(CC:cellular anatomical entity);GO:0031176(MF:endo-1,4-beta-xylanase activity)
A0A0K2RW47	MFT-3B-2
A0A1D5UV92	amino-acid N-acetyltransferase	GO:0006526(BP:arginine biosynthetic process);GO:0005737(CC:cytoplasm);GO:0004042(MF:acetyl-CoA:L-glutamate N-acetyltransferase activity);GO:0103045(MF:methione N-acyltransferase activity)	ko00220(Arginine biosynthesis)
A0A2X0SK24	non-specific serine/threonine protein kinase	GO:0006427(BP:histidyl-tRNA aminoacylation);GO:0016310(BP:phosphorylation);GO:0032543(BP:mitochondrial translation);GO:0051171(BP:regulation of nitrogen compound metabolic process);GO:0080090(BP:regulation of primary metabolic process);GO:0005739(CC:mitochondrion);GO:0005829(CC:cytosol);GO:0003723(MF:RNA binding);GO:0004674(MF:protein serine/threonine kinase activity);GO:0004821(MF:histidine-tRNA…	ko04140(Autophagy - animal);ko04138(Autophagy - yeast);;;
A0A3B5XY12	Importin N-terminal domain-containing protein	GO:0006606(BP:protein import into nucleus);GO:0005737(CC:cytoplasm);GO:0031267(MF:small GTPase binding)	ko03013(Nucleocytoplasmic transport);ko03250(Viral life cycle - HIV-1)
A0A3B5Z558	FAS1 domain-containing protein	GO:0009834(BP:plant-type secondary cell wall biogenesis);GO:0005886(CC:plasma membrane)
A0A3B5ZP61	Uncharacterized protein
A0A3B5ZP68	Uncharacterized protein
A0A3B6C469	Essential protein Yae1 N-terminal domain-containing protein
A0A3B6CDH7	Protein NO VEIN C-terminal domain-containing protein
A0A3B6EMQ3	SnoaL-like domain-containing protein
A0A3B6ESZ6	Uncharacterized protein	GO:0006635(BP:fatty acid beta-oxidation);GO:0005777(CC:peroxisome);GO:0051750(MF:delta(3,5)-delta(2,4)-dienoyl-CoA isomerase activity)	ko04146(Peroxisome)
A0A3B6EUZ4	RRM domain-containing protein	GO:0003676(MF:nucleic acid binding)
A0A3B6GLT0	DUF674 family protein
A0A3B6GVQ5	Protein TIC 22-like, chloroplastic	GO:0015031(BP:protein transport);GO:0009507(CC:chloroplast)
A0A3B6HXZ5	Acyl carrier protein	GO:0009507(CC:chloroplast);GO:0000036(MF:acyl carrier activity)
A0A3B6I1H4	T-complex protein 1 subunit alpha	GO:0005524(MF:ATP binding);GO:0016887(MF:ATP hydrolysis activity);GO:0051082(MF:unfolded protein binding);GO:0140662(MF:ATP-dependent protein folding chaperone)
A0A3B6I3U0	Chalcone synthase	GO:0009813(BP:flavonoid biosynthetic process);GO:0030639(BP:polyketide biosynthetic process);GO:0016747(MF:acyltransferase activity, transferring groups other than amino-acyl groups)	ko00945(Stilbenoid, diarylheptanoid and gingerol biosynthesis)
A0A3B6IPV4	VHS domain-containing protein	GO:0043328(BP:protein transport to vacuole involved in ubiquitin-dependent protein catabolic process via the multivesicular body sorting pathway);GO:0035091(MF:phosphatidylinositol binding);GO:0043130(MF:ubiquitin binding)
A0A3B6IV52	glutaminase	GO:0008614(BP:pyridoxine metabolic process);GO:0042823(BP:pyridoxal phosphate biosynthetic process);GO:0005829(CC:cytosol);GO:1903600(CC:glutaminase complex);GO:0004359(MF:glutaminase activity)	ko01240(Biosynthesis of cofactors);ko00750(Vitamin B6 metabolism)
A0A3B6JCW8	AMP-activated protein kinase glycogen-binding domain-containing protein	GO:0009507(CC:chloroplast)
A0A3B6JK42	Uncharacterized protein	GO:0006508(BP:proteolysis);GO:0004222(MF:metalloendopeptidase activity);GO:0046872(MF:metal ion binding)
A0A3B6KC26	Uncharacterized protein	GO:0044255(BP:cellular lipid metabolic process)
A0A3B6KF15	Plus3 domain-containing protein	GO:0016593(CC:Cdc73/Paf1 complex);GO:0003677(MF:DNA binding);GO:1990269(MF:RNA polymerase II C-terminal domain phosphoserine binding)
A0A3B6KFE8	Nitrile-specifier protein 5	GO:0080028(BP:nitrile biosynthetic process);GO:0005634(CC:nucleus);GO:0030234(MF:enzyme regulator activity)
A0A3B6KHW0	AT-hook motif nuclear-localized protein	GO:0005634(CC:nucleus);GO:0003680(MF:minor groove of adenine-thymine-rich DNA binding)
A0A3B6KML2	tRNA 4-demethylwyosine synthase (AdoMet-dependent)	GO:0031591(BP:wybutosine biosynthetic process);GO:0010181(MF:FMN binding);GO:0046872(MF:metal ion binding);GO:0051539(MF:4 iron, 4 sulfur cluster binding);GO:0102521(MF:tRNA-4-demethylwyosine synthase activity)
A0A3B6LS45	X8 domain-containing protein	GO:0009506(CC:plasmodesma)
A0A3B6LUE4	Expp1 protein	GO:0017183(BP:peptidyl-diphthamide biosynthetic process from peptidyl-histidine);GO:0046872(MF:metal ion binding)
A0A3B6MS65	Methyltransferase	GO:0032259(BP:methylation);GO:0005737(CC:cytoplasm);GO:0016020(CC:membrane);GO:0008757(MF:S-adenosylmethionine-dependent methyltransferase activity)
A0A3B6PNN6	Rab-GAP TBC domain-containing protein	GO:0005737(CC:cytoplasm);GO:0016020(CC:membrane)	ko04137(Mitophagy - animal)
A0A3B6RJF1	AUGMIN subunit 1	GO:0051225(BP:spindle assembly);GO:0051301(BP:cell division);GO:0005819(CC:spindle);GO:0005829(CC:cytosol);GO:0005874(CC:microtubule);GO:0070652(CC:HAUS complex)
A0A3B6RSY9	Terpene synthase N-terminal domain-containing protein	GO:0009686(BP:gibberellin biosynthetic process);GO:0009507(CC:chloroplast);GO:0000287(MF:magnesium ion binding);GO:0010333(MF:terpene synthase activity)	ko00904(Diterpenoid biosynthesis)
A0A3B6TZT2	GDSL esterase/lipase	GO:0016788(MF:hydrolase activity, acting on ester bonds)
P08453	Gamma-gliadin	GO:0045735(MF:nutrient reservoir activity)
W4ZVB1	Defensin	GO:0006952(BP:defense response)
W5BNT1	Nicotianamine synthase	GO:0030418(BP:nicotianamine biosynthetic process);GO:0008757(MF:S-adenosylmethionine-dependent methyltransferase activity);GO:0030410(MF:nicotianamine synthase activity)	ko00270(Cysteine and methionine metabolism);ko00999(Biosynthesis of various plant secondary metabolites)
W5D2H2	Uncharacterized protein
W5QKZ0	Chalcone-flavonone isomerase family protein	GO:0009813(BP:flavonoid biosynthetic process);GO:0045430(MF:chalcone isomerase activity)	ko00941(Flavonoid biosynthesis)
Note: Protein IDs with a light yellow background indicate significantly up-regulated proteins, those with a light blue background indicate significantly down-regulated proteins, those with a burgundy background indicate newly appeared proteins, and those with a blue background indicate disappeared proteins.

## Sheet: S10
Extended Data Table 10 | MCL clustering of proteins with common differential expression in semi-mature seeds of Zhongkenuomai 258 between the 45-day delayed sowing vs field and speed breeding in plant factory vs field groups
cluster number	cluster color	gene count	protein identifier	protein description
1	Red	6	4565.A0A3B6FEX0	SHSP domain-containing protein; Belongs to the small heat shock protein (HSP20) family.
1	Red	6	4565.A0A3B6JCW8	AMPK1_CBM domain-containing protein.
1	Red	6	4565.A0A3B6JLR9	SHSP domain-containing protein; Belongs to the small heat shock protein (HSP20) family.
1	Red	6	4565.A0A3B6KII1	SHSP domain-containing protein; Belongs to the small heat shock protein (HSP20) family.
1	Red	6	4565.A0A3B6U2S4	SHSP domain-containing protein; Belongs to the small heat shock protein (HSP20) family.
1	Red	6	4565.F4Y591	Heat shock protein 90.
2	Yellow	3	4565.A0A1D6S4Q1	Peptidyl-prolyl cis-trans isomerase; PPIases accelerate the folding of proteins. It catalyzes the cis-trans isomerization of proline imidic peptide bonds in oligopeptides; Belongs to the cyclophilin-type PPIase family.
2	Yellow	3	4565.A0A3B6A1Z7	CTP synthase; Catalyzes the ATP-dependent amination of UTP to CTP with either L-glutamine or ammonia as the source of nitrogen.
2	Yellow	3	4565.A0A3B6PSD8	Uncharacterized protein.
3	Lime Green	2	4565.A0A3B5Z4D4	Protein kinase domain-containing protein.
3	Lime Green	2	4565.A0A3B6N1S8	CBFD_NFYB_HMF domain-containing protein.
4	Green	2	4565.A0A3B6EF21	Uncharacterized protein.
4	Green	2	4565.A0A3B6HPS6	FAD_binding_3 domain-containing protein.
5	Blue	2	4565.A0A3B6ELP9	Uncharacterized protein; Belongs to the heat shock protein 70 family.
5	Blue	2	4565.A0A3B6HW16	ATP-dependent Clp protease proteolytic subunit; Belongs to the peptidase S14 family.
6	Purple	2	4565.A0A3B6QNK0	SWIRM domain-containing protein.
6	Purple	2	4565.A0A3B6SJ75	Aldedh domain-containing protein; Belongs to the aldehyde dehydrogenase family.

[truncated: 3 more sheets: S11, S12, S13]
